# Supplementary material for: A small-molecular europium complex with anion sensing sensitivity
Source: Royal Society of Chemistry journal article supplement (doi:10.1039/c2dt31607b), 2012-01-01
Supplement: c2dt31607b.pdf [file c2dt31607b.pdf]

## Supporting information

### A Small-molecular Europium Complex with Anion Sensing Sensitivity

Jianwei wang,<sup>a</sup> Jiang Wu,<sup>a</sup> Yanmei Chen,<sup>b</sup> Haiping Wang,<sup>a</sup> Yiran Li,<sup>a</sup> Weisheng Liu,<sup>a</sup> Hao Tian,<sup>a</sup> Ting Zhang,<sup>a</sup>  
Jun Xu,<sup>a</sup> and Yu Tang<sup>\*a</sup>

**Table S1.** Selected bond lengths (Å) and angles (°) for the EuL(NO<sub>3</sub>)<sub>3</sub> complex

|                   |           |                   |           |                   |          |
|-------------------|-----------|-------------------|-----------|-------------------|----------|
| O(1)-Eu(2)        | 2.615(8)  | N(1)-Eu(2)        | 2.593(10) | Eu(2)-O(2)        | 2.326(8) |
| Eu(2)-O(3)        | 2.454(8)  | Eu(2)-O(7)        | 2.455(9)  | Eu(2)-O(10)       | 2.479(9) |
| Eu(2)-O(6)        | 2.486(10) | Eu(2)-O(12)       | 2.500(10) | Eu(2)-O(9)        | 2.501(9) |
| Eu(2)-O(13)       | 2.514(9)  | C(2)-O(1)-Eu(2)   | 121.6(7)  | C(10)-O(1)-Eu(2)  | 119.8(7) |
| C(9)-N(1)-Eu(2)   | 118.1(8)  | C(1)-N(1)-Eu(2)   | 119.6(8)  | O(2)-Eu(2)-O(3)   | 153.3(3) |
| O(2)-Eu(2)-O(7)   | 75.9(3)   | O(3)-Eu(2)-O(7)   | 79.6(3)   | O(2)-Eu(2)-O(10)  | 130.9(3) |
| O(3)-Eu(2)-O(10)  | 75.5(3)   | O(7)-Eu(2)-O(10)  | 139.7(3)  | O(2)-Eu(2)-O(6)   | 75.7(3)  |
| O(3)-Eu(2)-O(6)   | 80.6(3)   | O(7)-Eu(2)-O(6)   | 50.7(3)   | O(10)-Eu(2)-O(6)  | 149.2(3) |
| O(2)-Eu(2)-O(12)  | 74.2(3)   | O(3)-Eu(2)-O(12)  | 116.6(3)  | O(7)-Eu(2)-O(12)  | 90.1(4)  |
| O(10)-Eu(2)-O(12) | 73.8(3)   | O(6)-Eu(2)-O(12)  | 135.4(4)  | O(2)-Eu(2)-O(9)   | 85.1(3)  |
| O(3)-Eu(2)-O(9)   | 120.9(3)  | O(7)-Eu(2)-O(9)   | 157.6(3)  | O(10)-Eu(2)-O(9)  | 50.3(3)  |
| O(6)-Eu(2)-O(9)   | 135.6(3)  | O(12)-Eu(2)-O(9)  | 73.1(3)   | O(2)-Eu(2)-O(13)  | 113.2(3) |
| O(3)-Eu(2)-O(13)  | 67.5(3)   | O(7)-Eu(2)-O(13)  | 70.8(3)   | O(10)-Eu(2)-O(13) | 70.6(3)  |
| O(6)-Eu(2)-O(13)  | 117.3(3)  | O(12)-Eu(2)-O(13) | 50.4(3)   | O(9)-Eu(2)-O(13)  | 107.1(3) |
| O(2)-Eu(2)-N(1)   | 121.7(3)  | O(3)-Eu(2)-N(1)   | 63.1(3)   | O(7)-Eu(2)-N(1)   | 119.8(3) |
| O(10)-Eu(2)-N(1)  | 75.4(3)   | O(6)-Eu(2)-N(1)   | 76.7(3)   | O(12)-Eu(2)-N(1)  | 147.8(4) |
| O(9)-Eu(2)-N(1)   | 80.3(3)   | O(13)-Eu(2)-N(1)  | 125.1(3)  | O(2)-Eu(2)-O(1)   | 61.3(3)  |
| O(3)-Eu(2)-O(1)   | 121.7(3)  | O(7)-Eu(2)-O(1)   | 114.2(3)  | O(10)-Eu(2)-O(1)  | 105.9(3) |
| O(6)-Eu(2)-O(1)   | 70.9(3)   | O(12)-Eu(2)-O(1)  | 119.5(3)  | O(9)-Eu(2)-O(1)   | 64.7(3)  |
| O(13)-Eu(2)-O(1)  | 169.6(3)  | N(1)-Eu(2)-O(1)   | 61.4(3)   | C(11)-O(2)-Eu(2)  | 132.1(7) |
| C(18)-O(3)-Eu(2)  | 123.8(7)  | C(19)-O(3)-Eu(2)  | 130.0(7)  | N(3)-O(6)-Eu(2)   | 96.0(9)  |
| N(3)-O(7)-Eu(2)   | 97.6(8)   | N(4)-O(9)-Eu(2)   | 96.6(8)   | N(4)-O(10)-Eu(2)  | 97.6(8)  |
| N(5)-O(12)-Eu(2)  | 96.8(8)   | N(5)-O(13)-Eu(2)  | 97.0(8)   |                   |          |
